# Supplementary material for: The Effect of Substrate on the Nutrient Content and Fatty Acid Composition of Edible Insects
Source: MDPI journal article supplement (doi:10.3390/insects13070590), 2022-06-28
Supplement: s1 [file s1]

**Table S1.** Macronutrients (ash, fat, protein, carbohydrate, and fiber) and calcium (Ca), phosphorous (P), and copper (Cu) content (% of dry matter, DM) of the substrates used for rearing edible insects.

| Substrate                                              | DM (%) | Ash (%) | CF, EE (%)        | CP (%) | CH (%)            | Fiber (%)         | Ca (%) | P (%) | Cu (%) | Reference |
|--------------------------------------------------------|--------|---------|-------------------|--------|-------------------|-------------------|--------|-------|--------|-----------|
| <b>House cricket /<i>Acheta domesticus</i></b>         |        |         |                   |        |                   |                   |        |       |        |           |
| Pellet                                                 | 95.8   |         |                   |        |                   |                   | 3.02   | 1.08  |        | [19]      |
| Alfalfa                                                | 18.5   |         |                   |        |                   |                   | 1.45   | 0.54  |        |           |
| Nutrobal                                               | 97.5   |         |                   |        |                   |                   | 20.28  | 0.54  |        |           |
| Carnivore + B Vits                                     | 99.8   |         |                   |        |                   |                   | 35.28  | 0.08  |        |           |
| Cricket Diet Plus                                      | 94.9   |         |                   |        |                   |                   | 12.14  | 0.80  |        |           |
| Cricket Diet                                           | 94.4   |         |                   |        |                   |                   | 7.15   | 0.91  |        |           |
| PPF (22% prot.)                                        | 91.3   | 5.7     | 1.4               | 21.9   | 65.0              | 5.9               |        |       |        | [17]      |
| PB (19% prot.)                                         | 98.9   | 6.7     | 3.4               | 18.9   | 65.3              | 5.6               |        |       |        |           |
| BF (16% prot.)                                         | 88.7   | 7.9     | 5.2               | 15.8   | 65.6              | 5.3               |        |       |        |           |
| PPFP (18% prot.)                                       | 68.5   | 5.7     | 1.7               | 17.5   | 69.1              | 6.0               |        |       |        |           |
| PPDP (20% prot.)                                       | 89.1   | 5.7     | 2.2               | 19.6   | 66.5              | 6.1               |        |       |        |           |
| Control                                                | 89.9   |         | 4.0 <sup>4</sup>  | 17.2   |                   |                   |        | 0.66  |        | [18]      |
| HPHF                                                   | 95.0   |         | 9.5 <sup>4</sup>  | 21.9   |                   |                   |        | 0.56  |        |           |
| HPLF                                                   | 95.1   |         | 1.0 <sup>4</sup>  | 22.9   |                   |                   |        | 0.53  |        |           |
| LPHF                                                   | 89.1   |         | 14.6 <sup>4</sup> | 12.9   |                   |                   |        | 0.22  |        |           |
| LPLF                                                   | 89.1   |         | 2.1 <sup>4</sup>  | 14.4   |                   |                   |        | 0.21  |        |           |
| <b>Lesser mealworm / <i>Alphitobius diaperinus</i></b> |        |         |                   |        |                   |                   |        |       |        |           |
| Control B-Ad                                           | 87.4   |         | 5.0               | 17.8   |                   |                   |        |       |        | [8]       |
| HPHS                                                   | 86.5   |         | 5.5               | 32.7   |                   |                   |        |       |        |           |
| HPLS                                                   | 95.1   |         | 5.8               | 39.1   |                   |                   |        |       |        |           |
| LPHS                                                   | 95.7   |         | 2.3               | 11.9   |                   |                   |        |       |        |           |
| <b>Black soldier fly / <i>Hermetia illucens</i></b>    |        |         |                   |        |                   |                   |        |       |        |           |
| Chicken feed                                           | 75.6   | 10.1    | 5.4               | 18.2   | 54.3              | 7.5               | 1.14   | 0.50  | 0.003  | [29]      |
| Brewery waste                                          | 80.2   | 6.5     | 7.5               | 13.5   | 55.3              | 9.0               | 0.52   | 0.46  | 0.015  |           |
| Food remains                                           | 70.7   | 8.2     | 7.2               | 20.1   | 42.8              | 6.8               | 0.54   | 0.24  | 0.011  |           |
| Fruits’ waste                                          | 74.9   | 8.3     | 6.7               | 15.2   | 47.3              | 3.1               | 0.95   | 0.22  | 0.005  |           |
| Hen diet                                               | 92.1   | 13.5    | 4.0               | 17.0   | 49.8 <sup>1</sup> | 15.7 <sup>2</sup> |        |       |        | [20]      |
| Okara                                                  | 18.3   | 4.1     | 17.2              | 39.2   | 7.47 <sup>1</sup> | 32.0 <sup>2</sup> |        |       |        |           |
| Maize distillers                                       | 94.9   | 5.4     | 11.1              | 29.5   | 17.3 <sup>1</sup> | 36.7 <sup>2</sup> |        |       |        |           |
| Brewer’s grains                                        | 15.8   | 4.1     | 2.9               | 15.8   | 11.2 <sup>1</sup> | 53.6 <sup>2</sup> |        |       |        |           |
| C (control)                                            | 87.5   | 3.3     | 4.2               | 10.6   | 59.7 <sup>1</sup> | 22.2 <sup>2</sup> |        |       |        | [21]      |
| TMD1                                                   | 87.1   | 2.4     | 4.0               | 11.1   | 68.9 <sup>1</sup> | 13.6 <sup>2</sup> |        |       |        |           |
| TMD2                                                   | 89.5   | 4.1     | 4.4               | 11.2   | 51.1 <sup>1</sup> | 29.2 <sup>2</sup> |        |       |        |           |
| TMD3                                                   | 88.2   | 4.1     | 4.0               | 13.8   | 56.1 <sup>1</sup> | 22.0 <sup>2</sup> |        |       |        |           |
| Hen diet                                               | 92.1   | 13.5    | 4.0               | 17.0   | 49.8 <sup>1</sup> | 15.7 <sup>2</sup> |        |       |        | [26]      |
| Okara                                                  | 18.3   | 4.1     | 17.2              | 39.2   | 7.5 <sup>1</sup>  | 32.0 <sup>2</sup> |        |       |        |           |
| Maize distillers                                       | 94.9   | 5.4     | 11.1              | 29.5   | 17.3 <sup>1</sup> | 36.7 <sup>2</sup> |        |       |        |           |
| Brewer’s grains                                        | 15.8   | 4.1     | 2.9               | 15.8   | 11.2 <sup>1</sup> | 53.6 <sup>2</sup> |        |       |        |           |
| Standard diet                                          | 25     | 4.6     | 2.9               | 15.6   | 37.2 <sup>1</sup> | 39.7 <sup>2</sup> |        |       |        | [25]      |
| Brewer’s waste                                         | 22     | 3.7     | 5.8               | 22.6   | 8.9 <sup>1</sup>  | 59.0 <sup>2</sup> |        |       |        |           |
| Pig manure                                             | 21     | 13.7    | 1.2               | 26.6   | 0 <sup>1</sup>    | 61.2 <sup>2</sup> |        |       |        |           |
| Semidigested grass                                     | 12     | 7.5     | 1.4               | 15.0   | 1 <sup>1</sup>    | 75.1 <sup>2</sup> |        |       |        |           |

|        |      |      |     |      |                   |                   |  |  |  |      |
|--------|------|------|-----|------|-------------------|-------------------|--|--|--|------|
| VEGFRU | 8.3  | 9.1  | 2.6 | 12.0 | 58.5 <sup>3</sup> | 17.8 <sup>2</sup> |  |  |  | [24] |
| FRU    | 13.2 | 3.0  | 2.8 | 4.6  | 75.7 <sup>3</sup> | 13.9 <sup>2</sup> |  |  |  |      |
| WIN    | 35.8 | 10.3 | 7.9 | 11.7 | 13.4 <sup>3</sup> | 56.6 <sup>2</sup> |  |  |  |      |
| BRE    | 23.2 | 4.0  | 8.7 | 20.1 | 22.6 <sup>3</sup> | 44.7 <sup>2</sup> |  |  |  |      |

|         |      |  |                   |      |  |  |  |      |  |      |
|---------|------|--|-------------------|------|--|--|--|------|--|------|
| Control | 90.0 |  | 3.5 <sup>4</sup>  | 19.1 |  |  |  | 0.67 |  | [18] |
| HPHF    | 95.0 |  | 9.5 <sup>4</sup>  | 21.9 |  |  |  | 0.56 |  |      |
| HPLF    | 95.1 |  | 1.0 <sup>4</sup>  | 22.9 |  |  |  | 0.53 |  |      |
| LPHF    | 89.1 |  | 14.6 <sup>4</sup> | 12.9 |  |  |  | 0.22 |  |      |
| LPLF    | 89.1 |  | 2.1 <sup>4</sup>  | 14.4 |  |  |  | 0.21 |  |      |

|    |      |      |     |      |  |                   |      |      |      |      |
|----|------|------|-----|------|--|-------------------|------|------|------|------|
| CM | 93.3 | 20.2 | 2.7 | 15.3 |  | 35.5 <sup>2</sup> | 0.19 | 0.10 | 0.06 | [27] |
| KW | 92.7 | 7.2  | 7.2 | 20.0 |  | 38.9 <sup>2</sup> | 0.19 | 0.20 | 0.06 |      |
| SG | 84.6 | 6.2  | 7.2 | 12.2 |  | 49.9 <sup>2</sup> | 0.35 | 0.48 | 0.09 |      |

|                               |      |  |     |      |  |  |  |     |       |      |
|-------------------------------|------|--|-----|------|--|--|--|-----|-------|------|
| T1 (SCR, <i>L. Buchneri</i> ) | 18.7 |  | 3.9 | 15.4 |  |  |  | 0.2 | 0.003 | [46] |
| T2 (SCR)                      | 18.7 |  | 3.9 | 15.4 |  |  |  | 0.2 | -     |      |
| T3 (AF)                       | 93.0 |  | 0.8 | 20.8 |  |  |  | 0.5 | 0.004 |      |

|                  |      |      |      |      |                   |      |      |      |       |      |
|------------------|------|------|------|------|-------------------|------|------|------|-------|------|
| Chicken feed     | 25.8 | 11.5 | 5.3  | 17.5 | 42.5 <sup>1</sup> | 23.2 | 2.95 | 0.56 | 0.003 | [28] |
| Digestate        | 24.3 | 29.9 | 6.2  | 24.6 | 0.7 <sup>1</sup>  | 38.6 | 1.56 | 1.54 | 0.002 |      |
| Vegetable waste  | 12.7 | 10.8 | 2.1  | 8.6  | 44.9 <sup>1</sup> | 33.6 | 0.68 | 0.24 | 0.001 |      |
| Restaurant waste | 26.2 | 4.5  | 13.9 | 15.7 | 61.8 <sup>1</sup> | 4.1  | 0.14 | 0.24 | 0.000 |      |

|                                    |      |      |     |      |                   |      |      |      |       |      |
|------------------------------------|------|------|-----|------|-------------------|------|------|------|-------|------|
| Control (middlings)                | 86.3 | 10.1 | 5.9 | 22.0 | 56.5 <sup>5</sup> | 5.5  | 1.41 | 0.77 | 0.005 | [30] |
| Protein (dried distillers' grains) | 93.0 | 5.9  | 8.4 | 31.2 | 46.9 <sup>5</sup> | 7.6  | 0.08 | 0.96 | 0.001 |      |
| Fibre (dried sugar beet pulp)      | 91.0 | 8.3  | 1.1 | 8.5  | 66.5 <sup>5</sup> | 15.6 | 1.15 | 0.09 | 0.001 |      |

#### Yellow mealworm / *Tenebrio molitor*

|                    |      |  |  |  |  |  |       |      |  |      |
|--------------------|------|--|--|--|--|--|-------|------|--|------|
| Pellet             | 95.8 |  |  |  |  |  | 3.02  | 1.08 |  | [19] |
| Alfalfa            | 18.5 |  |  |  |  |  | 1.45  | 0.54 |  |      |
| Nutrobal           | 97.5 |  |  |  |  |  | 20.28 | 0.54 |  |      |
| Carnivore + B Vits | 99.8 |  |  |  |  |  | 35.28 | 0.08 |  |      |
| Mealworm Diet Plus | 95.2 |  |  |  |  |  | 8.13  | 0.93 |  |      |
| Cricket Diet       | 94.4 |  |  |  |  |  | 7.15  | 0.91 |  |      |

|                   |       |     |      |      |      |  |  |  |  |      |
|-------------------|-------|-----|------|------|------|--|--|--|--|------|
| SG (spent grains) | 94.8  | 3.6 | 3.5  | 19.0 | 73.9 |  |  |  |  | [31] |
| B (bread)         | 97.1  | 1.9 | 0.3  | 11.5 | 86.3 |  |  |  |  |      |
| C (cookies)       | 100.0 | 0.7 | 10.5 | 6.6  | 82.3 |  |  |  |  |      |

|     |  |     |     |      |  |                   |  |  |  |      |
|-----|--|-----|-----|------|--|-------------------|--|--|--|------|
| WB  |  | 5.3 | 4.1 | 19.6 |  | 42.5 <sup>2</sup> |  |  |  | [32] |
| BSG |  | 3.8 | 7.3 | 22.5 |  | 58.0 <sup>2</sup> |  |  |  |      |

|           |      |  |                   |      |  |  |  |      |  |      |
|-----------|------|--|-------------------|------|--|--|--|------|--|------|
| Control 1 | 89.3 |  | 4.9 <sup>4</sup>  | 17.5 |  |  |  | 0.25 |  | [18] |
| Control 2 | 89.3 |  | 4.2 <sup>4</sup>  | 17.1 |  |  |  | 0.54 |  |      |
| HPHF      | 95.0 |  | 9.5 <sup>4</sup>  | 21.9 |  |  |  | 0.56 |  |      |
| HPLF      | 95.1 |  | 1.0 <sup>4</sup>  | 22.9 |  |  |  | 0.53 |  |      |
| LPHF      | 89.1 |  | 14.6 <sup>4</sup> | 12.9 |  |  |  | 0.22 |  |      |
| LPLF      | 89.1 |  | 2.1 <sup>4</sup>  | 14.4 |  |  |  | 0.21 |  |      |

|    |      |     |     |      |                   |      |  |  |  |      |
|----|------|-----|-----|------|-------------------|------|--|--|--|------|
| S1 | 90.3 | 0.8 | 1.2 | 13.2 | 84.2 <sup>5</sup> | 0.6  |  |  |  | [33] |
| S2 | 91.9 | 5.1 | 5.7 | 16.8 | 62.8 <sup>5</sup> | 9.5  |  |  |  |      |
| S3 | 78.0 | 4.8 | 6.2 | 15.4 | 56.9 <sup>5</sup> | 16.8 |  |  |  |      |
| S4 | 62.6 | 4.9 | 7.0 | 14.9 | 51.7 <sup>5</sup> | 21.6 |  |  |  |      |
| S5 | 46.8 | 5.3 | 7.4 | 11.8 | 44.1 <sup>5</sup> | 31.5 |  |  |  |      |

|                 |      |     |      |  |     |
|-----------------|------|-----|------|--|-----|
| Control B-Tm/Za | 89.0 | 3.0 | 17.1 |  | [8] |
| HPHS            | 86.5 | 5.5 | 32.7 |  |     |
| HPLS            | 95.1 | 5.8 | 39.1 |  |     |
| LPHS            | 95.7 | 2.3 | 11.9 |  |     |

|            |      |      |      |      |                   |
|------------|------|------|------|------|-------------------|
| Wheat bran | 5.0  | 10.1 | 17.0 | 67.9 | [34] <sup>6</sup> |
| MSCS       | 6.9  | 12.8 | 3.9  | 76.4 |                   |
| HDSM       | 11.6 | 4.8  | 43.2 | 40.5 |                   |
| SDG        | 15.0 | 6.9  | 13.9 | 64.2 |                   |

---

CF = Crude fat, EE = Ether extract, CP = Crude protein, CH = Carbohydrates

<sup>1</sup> Non-fibrous carbohydrate (NFC)

<sup>2</sup> Neutral detergent fiber (NDF)

<sup>3</sup> Non-structural carbohydrates

<sup>4</sup> Total fatty acids (TFA)

<sup>5</sup> Nitrogen free extract (NFE)

<sup>6</sup> Analyzed before rearing of insects

**Table S2.** Macronutrients (ash, fat, protein, carbohydrate, and fiber) and calcium (Ca), phosphorous (P), and copper (Cu) content (% of dry matter, DM) of the edible insects.

| Substrate                                              | DM<br>(%) | Ash<br>(%) | CF,<br>EE<br>(%)  | CP<br>(%) | CH<br>(%) | Fiber<br>(%) | Ca<br>(%) | P<br>(%) | Cu<br>(%) | Reference          |
|--------------------------------------------------------|-----------|------------|-------------------|-----------|-----------|--------------|-----------|----------|-----------|--------------------|
| <b>House cricket /<i>Acheta domesticus</i></b>         |           |            |                   |           |           |              |           |          |           |                    |
| Pellet                                                 |           |            |                   |           |           |              | 0.22      | 0.78     |           | [19] <sup>7</sup>  |
| Alfalfa                                                |           |            |                   |           |           |              | 0.17      | 0.81     |           |                    |
| Nutrobal                                               |           |            |                   |           |           |              | 0.38      | 0.89     |           |                    |
| Carnivore + B Vits                                     |           |            |                   |           |           |              | 0.58      | 0.88     |           |                    |
| Cricket Diet Plus                                      |           |            |                   |           |           |              | 0.81      | 0.81     |           |                    |
| Cricket Diet                                           |           |            |                   |           |           |              | 0.67      | 0.81     |           |                    |
| PPF (22% prot.)                                        | 29.9      | 4.6        | 8.9               | 76.2      | 10.2      | 3.7          |           |          |           | [17]               |
| PB (19% prot.)                                         | 29.5      | 4.4        | 19.3              | 71.0      | 5.2       | 6.4          |           |          |           |                    |
| BF (16% prot.)                                         | 31.7      | 4.5        | 14.8              | 70.4      | 10.3      | 7.5          |           |          |           |                    |
| PPFP (18% prot.)                                       | 40.6      | 2.9        | 43.9              | 48.1      | 5.1       | 4.5          |           |          |           |                    |
| PPDP (20% prot.)                                       | 29.3      | 4.5        | 12.9              | 75.8      | 6.8       | 6.6          |           |          |           |                    |
| Control                                                | 24.1      |            | 17.4 <sup>5</sup> | 57.8      |           |              |           | 0.89     |           | [18]               |
| HPHF                                                   | 25.7      |            | 20.8 <sup>5</sup> | 59.2      |           |              |           | 0.85     |           |                    |
| HPLF                                                   | 24.0      |            | 20.8 <sup>5</sup> | -         |           |              |           | -        |           |                    |
| LPHF                                                   | 25.1      |            | -                 | -         |           |              |           | -        |           |                    |
| LPLF                                                   | 24.8      |            | -                 | -         |           |              |           | -        |           |                    |
| <b>Lesser mealworm / <i>Alphitobius diaperinus</i></b> |           |            |                   |           |           |              |           |          |           |                    |
| Control B-Ad                                           | 33.3      |            | 24.3              | 61.7      |           |              |           |          |           | [8]                |
| HPHS                                                   | 31.8      |            | 21.8              | 64.3      |           |              |           |          |           |                    |
| HPLS                                                   | 30.0      |            | 18.1              | 65.0      |           |              |           |          |           |                    |
| LPHS                                                   | 33.3      |            | 13.4              | -         |           |              |           |          |           |                    |
| <b>Black soldier fly / <i>Hermetia illucens</i></b>    |           |            |                   |           |           |              |           |          |           |                    |
| Chicken feed                                           | 76.6      | 4.1        | 31.3              | 48.9      | 56.9      | 9.2          | 1.29      | 0.46     | 0.003     | [29] <sup>9</sup>  |
| Brewery waste                                          | 76.6      | 11.2       | 33.2              | 44.5      | 51.8      | 10.3         | 0.52      | 0.21     | 0.002     |                    |
| Food remains                                           | 82.8      | 9.5        | 34.3              | 33.0      | 44.0      | 5.2          | 0.52      | 0.18     | 0.003     |                    |
| Fruits’ waste                                          | 72.3      | 13.9       | 34.1              | 38.3      | 47.0      | 5.2          | 0.95      | 0.41     | 0.006     |                    |
| Hen diet                                               | 38.9      | 11.7       | 25.1              | 52.8      |           |              |           |          |           | [20] <sup>10</sup> |
| Okara                                                  | 37.4      | 5.9        | 31.2              | 51.2      |           |              |           |          |           |                    |
| Maize distillers                                       | 38.5      | 4.9        | 29.9              | 53.4      |           |              |           |          |           |                    |
| Brewer’s grains                                        | 36.5      | 7.4        | 23.2              | 54.1      |           |              |           |          |           |                    |
| C (control)                                            | 33.3      | 10.1       | 33.0              | 34.0      |           |              |           |          |           | [21] <sup>9</sup>  |
| TMD1                                                   | 32.2      | 5.5        | 46.9              | 22.2      |           |              |           |          |           |                    |
| TMD2                                                   | 34.4      | 11.0       | 31.9              | 34.7      |           |              |           |          |           |                    |
| TMD3                                                   | 33.2      | 8.9        | 32.5              | 34.2      |           |              |           |          |           |                    |
| Hen diet                                               | 38.9      | 13.5       | 26.0              | 48.2      |           |              |           |          |           | [26] <sup>10</sup> |
| Okara                                                  | 37.4      | 5.8        | 32.1              | 49.8      |           |              |           |          |           |                    |
| Maize distillers                                       | 38.4      | 4.6        | 30.3              | 51.7      |           |              |           |          |           |                    |
| Brewer’s grains                                        | 35.6      | 7.7        | 25.1              | 52.5      |           |              |           |          |           |                    |
| Standard diet                                          |           | 4.0        | 36.4              | 50.6      |           |              |           |          |           | [25] <sup>10</sup> |
| Brewer’s waste                                         |           | 5.7        | 33.7              | 49.9      |           |              |           |          |           |                    |
| Pig manure                                             |           | 24.0       | 17.5              | 45.9      |           |              |           |          |           |                    |
| Semidigested grass                                     |           | 29.6       | 5.5               | 46.4      |           |              |           |          |           |                    |

|        |      |      |      |                                        |                   |                    |  |  |  |
|--------|------|------|------|----------------------------------------|-------------------|--------------------|--|--|--|
| VEGFRU | 22.0 | 13.0 | 26.3 | 41.9 <sup>1</sup><br>31.3 <sup>2</sup> | 17.1 <sup>4</sup> | [24] <sup>10</sup> |  |  |  |
| FRU    | 28.3 | 7.2  | 40.7 | 30.8 <sup>1</sup><br>23.0 <sup>2</sup> | 19.8 <sup>4</sup> |                    |  |  |  |
| WIN    | 26.5 | 14.6 | 32.2 | 34.4 <sup>1</sup><br>25.7 <sup>2</sup> | 17.7 <sup>4</sup> |                    |  |  |  |
| BRE    | 29.1 | 7.3  | 29.9 | 53.0 <sup>1</sup><br>39.6 <sup>2</sup> | 8.7 <sup>4</sup>  |                    |  |  |  |

|         |      |  |                   |      |  |      |                    |  |  |
|---------|------|--|-------------------|------|--|------|--------------------|--|--|
| Control | 33.9 |  | 25.4 <sup>5</sup> | 43.8 |  | 0.97 | [18] <sup>10</sup> |  |  |
| HPHF    | 32.9 |  | 24.7 <sup>5</sup> | 46.3 |  | 0.85 |                    |  |  |
| HPLF    | 35.6 |  | 25.5 <sup>5</sup> | 43.5 |  | 0.86 |                    |  |  |
| LPHF    | 35.1 |  | 28.0 <sup>5</sup> | 38.8 |  | 0.67 |                    |  |  |
| LPLF    | 35.3 |  | 33.5 <sup>5</sup> | 38.3 |  | 0.64 |                    |  |  |

|    |      |      |      |      |                   |      |      |      |                    |
|----|------|------|------|------|-------------------|------|------|------|--------------------|
| CM | 80.7 | 9.3  | 30.1 | 41.1 | 21.9 <sup>4</sup> | 0.32 | 0.39 | 0.04 | [27] <sup>10</sup> |
| KW | 87.7 | 9.6  | 34.3 | 33.0 | 20.4 <sup>4</sup> | 0.2  | 0.41 | 0.02 |                    |
| SG | 83.1 | 11.6 | 31   | 41.3 | 28.6 <sup>4</sup> | 0.17 | 0.46 | 0.05 |                    |

|                               |  |  |      |      |  |  |  |        |                    |
|-------------------------------|--|--|------|------|--|--|--|--------|--------------------|
| T1 (SCR, <i>L. Buchneri</i> ) |  |  | 30.0 | 55.3 |  |  |  | 0.0006 | [46] <sup>10</sup> |
| T2 (SCR)                      |  |  | 26.1 | 52.9 |  |  |  | 0.0006 |                    |
| T3 (AF)                       |  |  | 24.3 | 50.4 |  |  |  | 0.0008 |                    |

|                  |      |      |      |      |  |      |      |       |                   |
|------------------|------|------|------|------|--|------|------|-------|-------------------|
| Chicken feed     | 38.7 | 10.0 | 33.6 | 41.2 |  | 2.87 | 0.50 | 0.001 | [28] <sup>9</sup> |
| Digestate        | 38.6 | 19.7 | 21.8 | 42.2 |  | 6.62 | 0.44 | 0.001 |                   |
| Vegetable waste  | 41.0 | 9.6  | 37.1 | 39.9 |  | 2.87 | 0.40 | 0.001 |                   |
| Restaurant waste | 38.1 | 2.7  | 38.6 | 43.1 |  | 0.12 | 0.41 | 0.001 |                   |

|                                    |      |      |      |      |  |      |      |       |                    |
|------------------------------------|------|------|------|------|--|------|------|-------|--------------------|
| Control (middlings)                | 30.2 | 13.5 | 30.8 | 37.2 |  | 3.94 | 0.89 | 0.003 | [30] <sup>10</sup> |
| Protein (dried distillers' grains) | 30.2 | 4.8  | 38.6 | 44.6 |  | 0.54 | 0.87 | 0.001 |                    |
| Fibre (dried sugar beet pulp)      | 17.9 | 22.9 | 3.4  | 52.3 |  | 6.16 | 1.32 | 0.001 |                    |

#### Yellow mealworm / *Tenebrio molitor*

|                    |  |  |  |  |  |      |      |                   |  |
|--------------------|--|--|--|--|--|------|------|-------------------|--|
| Pellet             |  |  |  |  |  | 0.22 | 0.79 | [19] <sup>7</sup> |  |
| Alfalfa            |  |  |  |  |  | 0.13 | 0.71 |                   |  |
| Nutrobal           |  |  |  |  |  | 0.57 | 0.75 |                   |  |
| Carnivore + B Vits |  |  |  |  |  | 1.05 | 0.74 |                   |  |
| Mealworm Diet Plus |  |  |  |  |  | 0.56 | 0.78 |                   |  |
| Cricket Diet       |  |  |  |  |  | 0.50 | 0.76 |                   |  |

|                   |      |     |      |                                        |                                        |      |  |  |  |
|-------------------|------|-----|------|----------------------------------------|----------------------------------------|------|--|--|--|
| SG (spent grains) | 33.3 | 3.4 | 19.4 | 51.3 <sup>1</sup><br>39.1 <sup>3</sup> | 25.2 <sup>1</sup><br>37.6 <sup>3</sup> | [31] |  |  |  |
| B (bread)         | 32.6 | 3.1 | 45.4 | 42.3 <sup>1</sup><br>32.2 <sup>3</sup> | 8.3 <sup>1</sup><br>18.6 <sup>3</sup>  |      |  |  |  |
| C (cookies)       | 35.6 | 2.7 | 50.0 | 37.3 <sup>1</sup><br>28.4 <sup>3</sup> | 9.8 <sup>1</sup><br>18.8 <sup>3</sup>  |      |  |  |  |

|     |      |     |      |      |                   |  |  |  |
|-----|------|-----|------|------|-------------------|--|--|--|
| WB  | 36.9 | 1.3 | 12.4 | 13.4 | [32] <sup>8</sup> |  |  |  |
| BSG | 33.7 | 1.3 | 6.4  | 14.8 |                   |  |  |  |

|           |      |  |                   |      |  |      |      |  |  |
|-----------|------|--|-------------------|------|--|------|------|--|--|
| Control 1 | 39.8 |  | 27.0 <sup>5</sup> | 52.4 |  | 0.97 | [18] |  |  |
| Control 2 | 39.2 |  | 30.9 <sup>5</sup> | 49.2 |  | 0.77 |      |  |  |
| HPHF      | 41.5 |  | 26.5 <sup>5</sup> | 53.6 |  | 0.89 |      |  |  |
| HPLF      | 36.7 |  | 23.0 <sup>5</sup> | 53.5 |  | 0.88 |      |  |  |
| LPHF      | 37.2 |  | 26.8 <sup>5</sup> | 44.4 |  | 0.88 |      |  |  |
| LPLF      | 38.2 |  | 28.5 <sup>5</sup> | 47.5 |  | 0.82 |      |  |  |

|                 |      |     |      |      |                   |      |      |
|-----------------|------|-----|------|------|-------------------|------|------|
| S1              | 35.3 | 3.5 | 40.1 | 37.8 | 12.7 <sup>6</sup> | 6.0  | [33] |
| S2              | 39.5 | 3.9 | 34.0 | 50.1 | 4.9 <sup>6</sup>  | 7.1  |      |
| S3              | 38.1 | 3.9 | 32.1 | 47.6 | 8.1 <sup>6</sup>  | 8.3  |      |
| S4              | 36.7 | 3.9 | 35.3 | 39.4 | 13.4 <sup>6</sup> | 8.0  |      |
| S5              | 31.5 | 4.6 | 36.1 | 38.1 | 11.1 <sup>6</sup> | 10.2 |      |
| Control B-Tm/Za | 27.3 |     | 25.0 | 45.1 |                   |      | [8]  |
| HPHS            | 33.4 |     | 26.3 | 48.6 |                   |      |      |
| HPLS            | 29.4 |     | 27.6 | 47.5 |                   |      |      |
| LPHS            | 33.3 |     | 18.9 | 46.9 |                   |      |      |
| Wheat bran      |      | 8.1 | 16.9 | 68.9 | 6.0               |      | [34] |
| MSCS            |      | 5.9 | 6.1  | 76.3 | 11.7              |      |      |
| HDSM            |      | 6.6 | 8.1  | 74.4 | 10.8              |      |      |
| SDG             |      | 7.7 | 12.0 | 70.1 | 10.2              |      |      |

---

CF = Crude fat, EE = Ether extract, CP = Crude protein, CH = Carbohydrates, - = Values are not available

<sup>1</sup> Conversion factor 6.25 for crude protein

<sup>2</sup> Conversion factor 4.67 for crude protein

<sup>3</sup> Conversion factor 4.76 for crude protein

<sup>4</sup> Neutral detergent fiber (NDF)

<sup>5</sup> Total fatty acids (TFA)

<sup>6</sup> Nitrogen free extract (NFE)

<sup>7</sup> After 72 h of rearing

<sup>8</sup> On a fresh weight basis (%FW)

<sup>9</sup> prepupae

<sup>10</sup> larvae
